# Supplementary material for: Progressive reorganization of mitochondrial apparatus in aging skeletal muscle of naked mole rats (Heterocephalus glaber) as revealed by electron microscopy: potential role in continual maintenance of muscle activity
Source: publisher site journal article supplement (doi:10.18632/aging.203720), 2021-11-28
Supplement: Supplementary file [file aging-v13i22-203720-supplementary-material-SD1.pdf]

## SUPPLEMENTARY FIGURES

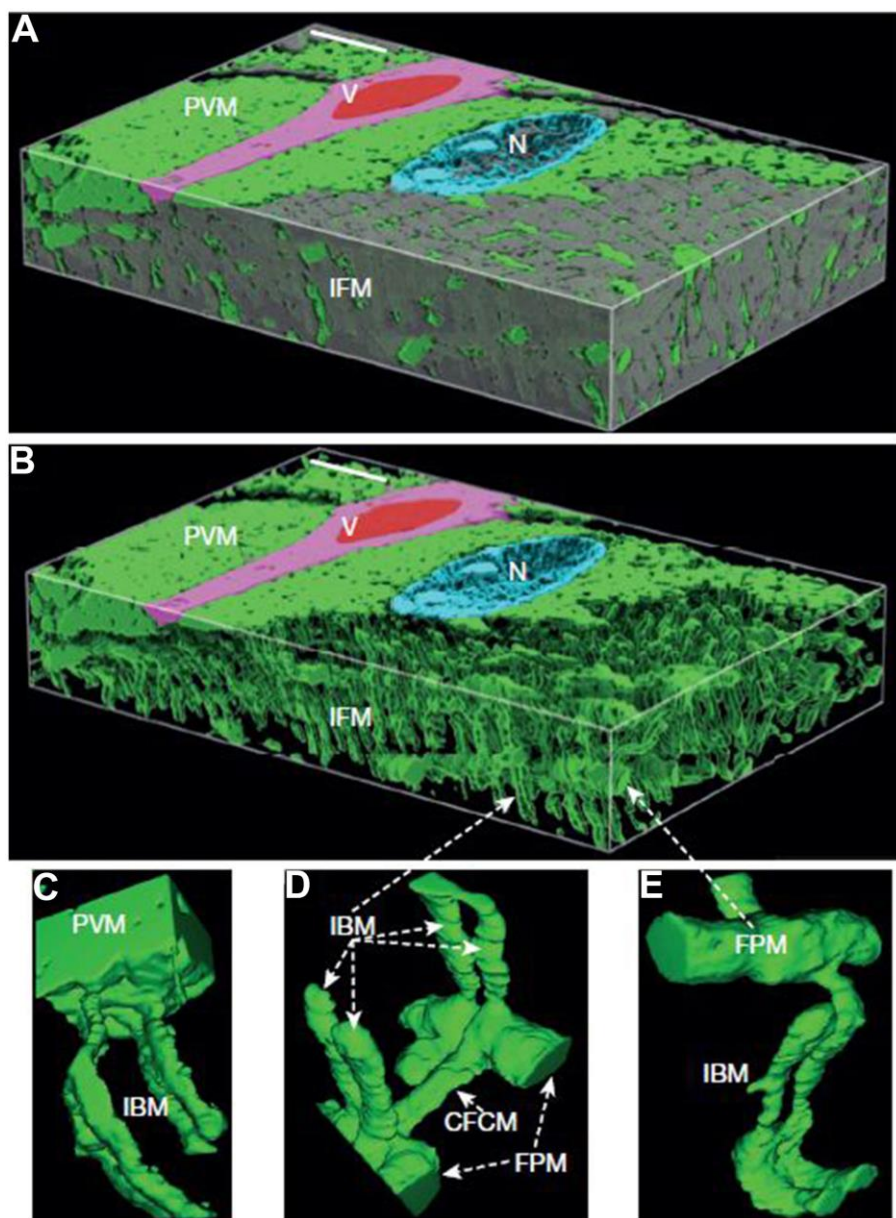

**Supplementary Figure 1. Muscle mitochondria form highly connected networks.** (A) 3D surface rendering of 25.53\*24.06\*4.23  $\mu\text{m}$  FIB-SEM volume segmented to show spatial relationships between mitochondria (green) and other structures (nucleus (N), cyan; capillary (V), magenta; erythrocyte, red; myofibrils, grey). (B) Removing myofibrils highlights different morphologies within intrafibrillar mitochondrial (IFM) network. (C–E) Zooming in reveals projections from paravascular mitochondria (PVM) into I-band mitochondria (IBM) (C), and numerous interactions between IBM and cross-fibre connection mitochondria (CFCM) (D) and fibre parallel mitochondria (FPM) (D, E). Scale bars, 3  $\mu\text{m}$ . Representative of eight separate volumes analysed from four animals. (From Glancy et al. [42]).

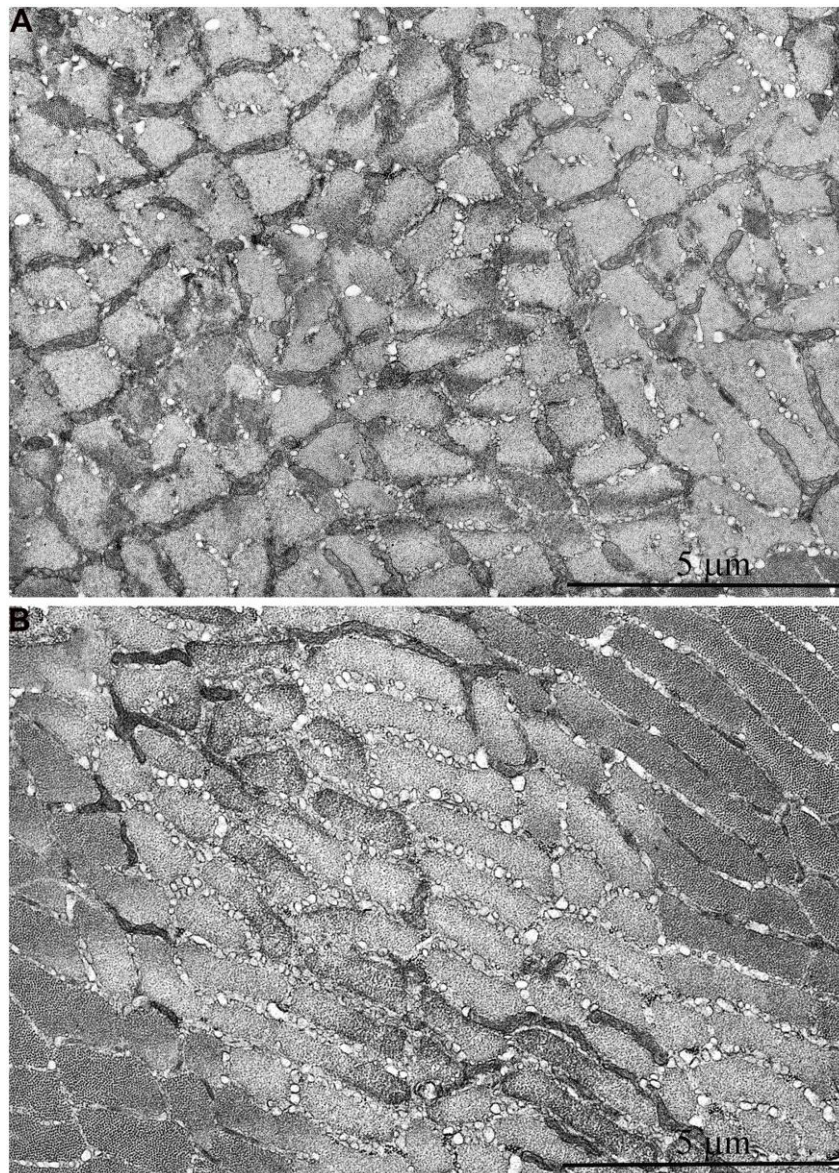

**Supplementary Figure 2. Ultrastructure of the skeletal muscle mitochondria of the C57BL/6 mouse on a cross-section. (A)** At the age of 2.5 months; **(B)** at the age of 2.5 years.



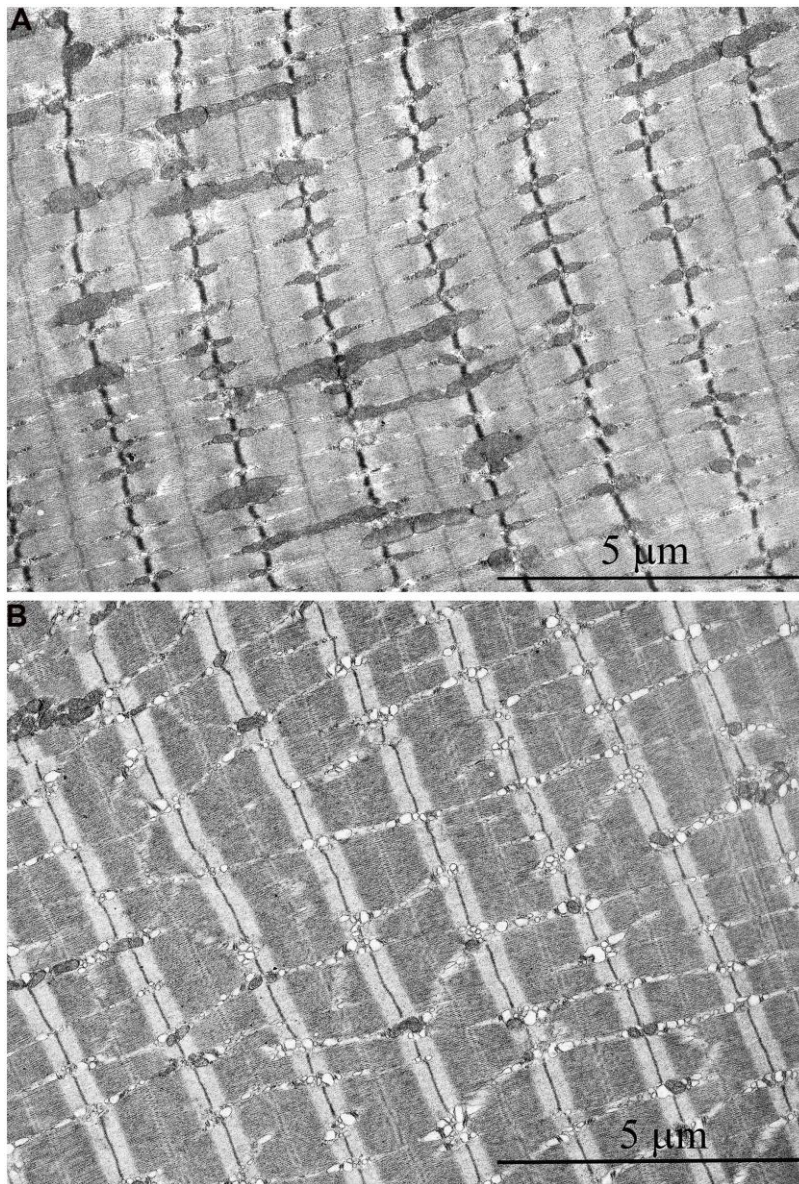

**Supplementary Figure 3. Ultrastructure of the skeletal muscle mitochondria of the C57BL/6 mouse on a longitudinal section.** (A) At the age of 2.5 months; (B) at the age of 2.5 years.
